# Supplementary material
Source: Springer Nature journal article supplement (https://www.springermedizin.de/resource/supplementary/12885_2011_2729_MOESM6_ESM.pdf/9461788)

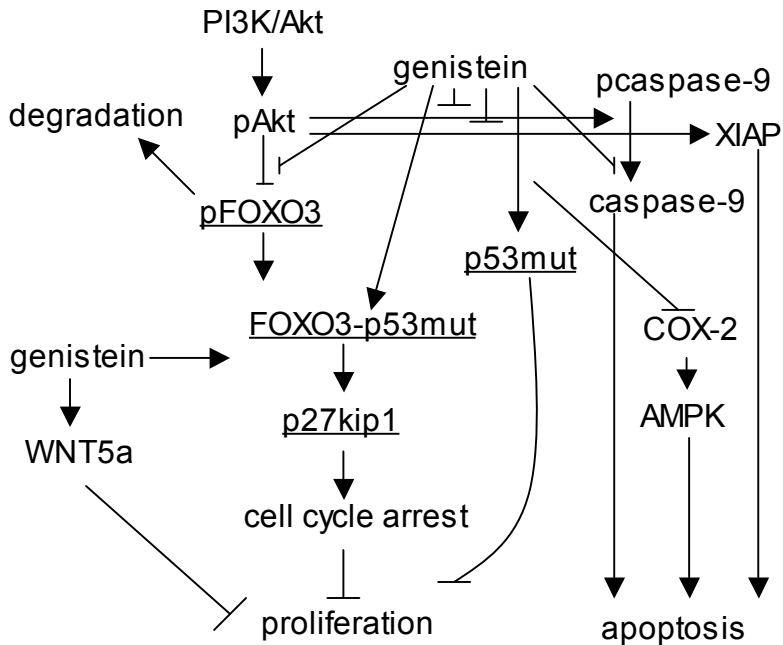

Supplement: MOESM6 [file 9461788]
